# Supplementary material
Source: publisher site journal article supplement (https://www.spandidos-publications.com/7409/downloadSupplementary)
Supplement: Supplementary file 1 [file downloadSupplementary]

Table SI. Parent and product ions of the analytes with individually optimized detection parameters.

| Drug | Parent Ion [M-H] <sup>-</sup> (m/z) | Product Ion [M-H] <sup>-</sup> (m/z) | DP | EP | CE | CXP | Retention time (min) |
|------|-------------------------------------|--------------------------------------|----|----|----|-----|----------------------|
| CSA  | 1219.5                              | 1203.3                               | 56 | 12 | 38 | 23  | 2.65                 |
| CSD  | 1234.1                              | 1217.6                               | 40 | 12 | 29 | 25  | 2.73                 |

Table SII. Sequences of primers used for PCR.

| Primer name                                     | Primer information | Base sequence (5'-3') |                          | Tm value (°C) | CG%  | Length |
|-------------------------------------------------|--------------------|-----------------------|--------------------------|---------------|------|--------|
| GAPDH                                           | NM_017008.4        | Sense                 | CGCTAACATCAAATGGGGTG     | 58.8          | 50.0 | 201    |
|                                                 |                    | Antisense             | TTGCTGACAATCTTGAGGGAG    | 57.7          | 47.6 |        |
| P-glycoprotein                                  | NM_133401.1        | Sense                 | TCACCAAGCGACTCCGATAC     | 58.3          | 55   | 195    |
|                                                 |                    | Antisense             | TGATGATGCCTGTCCCAAGA     | 59.1          | 50   |        |
| Cytochrome P450 3A2                             | NM_153312.2        | Sense                 | ATTCTAAGCATAAGCACCGAGTG  | 58.7          | 43.5 | 158    |
|                                                 |                    | Antisense             | TGTGCTGCTGGTGGTTTCAT     | 59.4          | 50   |        |
| UDP-glucuronosyltransferase 1A1                 | NM_012683.2        | Sense                 | ACTATTCTTGTCAAATGGCTACCC | 59            | 41.7 | 231    |
|                                                 |                    | Antisense             | GTTTTCCAAATCATCGGCAGT    | 59.2          | 42.9 |        |
| Multi-drug resistance protein 2                 | NM_012833.2        | Sense                 | TGTGGCAGTTGAGCGAATAAGT   | 60.1          | 45.5 | 246    |
|                                                 |                    | Antisense             | AAGAGGCAGTTTGTGAGGGATG   | 60.8          | 50   |        |
| Pregnane X receptor                             | NM_052980.2        | Sense                 | CTTCGCCAAAGTCATATCCCA    | 60.2          | 47.6 | 121    |
|                                                 |                    | Antisense             | TGTTTCCGTGTCTGAAACATCG   | 59.9          | 50   |        |
| Constitutive androstane receptor                | NM_001270838.1     | Sense                 | GAGCCACGGGCTATCATTTTC    | 59.6          | 55   | 106    |
|                                                 |                    | Antisense             | CTCCCAGCAAACGGACAGAT     | 59.8          | 55   |        |
| Farnesoid X receptor                            | NM_021745.1        | Sense                 | GTGACCTCCACGACCAAGCT     | 59.6          | 60   | 224    |
|                                                 |                    | Antisense             | GGTCCAGTGTCTGAAACCCTG    | 59.1          | 57.1 |        |
| Bile salt export pump                           | NM_031760.1        | Sense                 | TGGTTTCAAGGCAATGTTAGGA   | 60            | 40.9 | 281    |
|                                                 |                    | Antisense             | GAGAAGCGAATCCCGTCAAC     | 59.5          | 55   |        |
| Breast cancer resistance protein                | NM_181381.2        | Sense                 | ATTGGTGCCCTTACTTTGGTC    | 60.1          | 45.5 | 236    |
|                                                 |                    | Antisense             | ACACTTGGCAAGAACCTCATAGG  | 60.3          | 47.8 |        |
| Organic anion transporting polypeptides 1B2     | NM_031650.3        | Sense                 | TTCGTGGTGATAAGAAGCCG     | 58.7          | 50   | 218    |
|                                                 |                    | Antisense             | CAATTCAGGTTGGACGCTCTT    | 59.4          | 47.6 |        |
| Sodium taurocholate co-transporting polypeptide | NM_017047.1        | Sense                 | ACTGGCTACCTCCTCCCTGAT    | 59.3          | 57.1 | 118    |
|                                                 |                    | Antisense             | TTGGAATCCTGTTTCCATGCT    | 59.5          | 42.9 |        |
| Cytochrome P450 3A1                             | NM_013105.2        | Sense                 | ACTGCATTGGCATGAGGTTTG    | 60.8          | 47.6 | 170    |
|                                                 |                    | Antisense             | ATCCCGTGGCACAAACCTTT     | 59.9          | 52.6 |        |
